# Supplementary material for: Automatic segmentation of myocardium at risk from contrast enhanced SSFP CMR: validation against expert readers and SPECT
Source: Springer Nature journal article supplement (doi:10.1186/s12880-016-0124-1), 2016-03-05

CHILL-MI

MITOCARE

Included in clinical trial

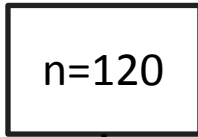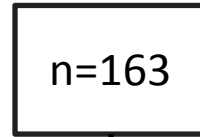

CE-SSFP CMR images acquired

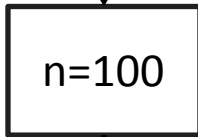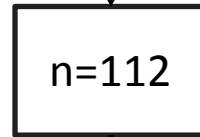

*Excluded due to non-diagnostic CE-SSFP*

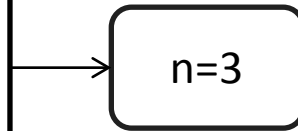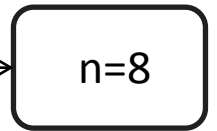

*Excluded due to missing LGE images*

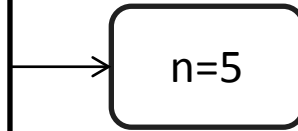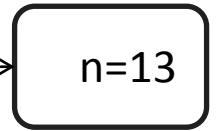

CE-SSFP and LGE of diagnostic quality and full coverage

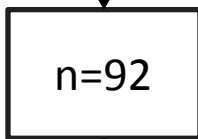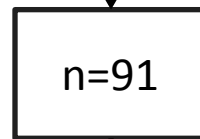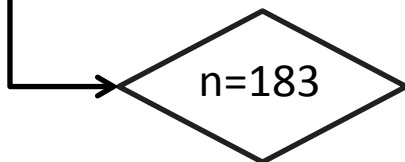

Supplement: MOESM1 [file 12880_2016_124_MOESM1_ESM.pdf]
